# Supplementary material for: Physiological and Transcriptional Responses in Weaned Piglets Fed Diets with Varying Phosphorus and Calcium Levels
Source: MDPI journal article supplement (doi:10.3390/nu11020436), 2019-02-20
Supplement: s1 [file s1]

**Table S3** P, Ca and Zn intake of pigs fed variable dietary amounts of calcium and phosphorus throughout the feeding trial.

| <b>Calcium intake (g/day)</b>         |                    |           |                     |           |                     |           |
|---------------------------------------|--------------------|-----------|---------------------|-----------|---------------------|-----------|
| <b>Trial week</b>                     | <b>L</b>           |           | <b>M</b>            |           | <b>H</b>            |           |
|                                       | <b>Mean</b>        | <b>SD</b> | <b>Mean</b>         | <b>SD</b> | <b>Mean</b>         | <b>SD</b> |
| 28-35 dpn                             | 1.59 <sup>a</sup>  | 0.40      | 2.24 <sup>a</sup>   | 0.80      | 3.02 <sup>b</sup>   | 0.68      |
| 35-42 dpn                             | 3.42 <sup>a</sup>  | 0.68      | 5.05 <sup>b</sup>   | 0.79      | 7.44 <sup>c</sup>   | 1.47      |
| 42-49 dpn                             | 5.58 <sup>a</sup>  | 1.05      | 7.77 <sup>b</sup>   | 1.37      | 10.27 <sup>c</sup>  | 1.48      |
| 49-56 dpn                             | 6.74 <sup>a</sup>  | 0.66      | 9.90 <sup>b</sup>   | 2.29      | 11.08 <sup>b</sup>  | 1.44      |
| 56-63 dpn                             | 7.44 <sup>a</sup>  | 1.18      | 10.92 <sup>b</sup>  | 1.55      | 10.23 <sup>b</sup>  | 2.07      |
| <b>Calcium intake (g/day/kgBW)</b>    |                    |           |                     |           |                     |           |
| <b>Trial week</b>                     | <b>L</b>           |           | <b>M</b>            |           | <b>H</b>            |           |
|                                       | <b>Mean</b>        | <b>SD</b> | <b>Mean</b>         | <b>SD</b> | <b>Mean</b>         | <b>SD</b> |
| 28-35 dpn                             | 0.17 <sup>a</sup>  | 0.07      | 0.24 <sup>a</sup>   | 0.10      | 0.31 <sup>b</sup>   | 0.06      |
| 35-42 dpn                             | 0.29 <sup>a</sup>  | 0.03      | 0.44 <sup>b</sup>   | 0.05      | 0.64 <sup>c</sup>   | 0.10      |
| 42-49 dpn                             | 0.38 <sup>a</sup>  | 0.04      | 0.54 <sup>b</sup>   | 0.05      | 0.75 <sup>c</sup>   | 0.04      |
| 49-56 dpn                             | 0.37 <sup>a</sup>  | 0.02      | 0.56 <sup>b</sup>   | 0.09      | 0.77 <sup>c</sup>   | 0.14      |
| 56-63 dpn                             | 0.34 <sup>a</sup>  | 0.03      | 0.54 <sup>b</sup>   | 0.10      | 0.70 <sup>c</sup>   | 0.19      |
| <b>Phosphorus intake (g/day)</b>      |                    |           |                     |           |                     |           |
| <b>Trial week</b>                     | <b>L</b>           |           | <b>M</b>            |           | <b>H</b>            |           |
|                                       | <b>Mean</b>        | <b>SD</b> | <b>Mean</b>         | <b>SD</b> | <b>Mean</b>         | <b>SD</b> |
| 28-35 dpn                             | 1.15 <sup>a</sup>  | 0.29      | 1.48 <sup>a,b</sup> | 0.53      | 1.82 <sup>b</sup>   | 0.41      |
| 35-42 dpn                             | 2.47 <sup>a</sup>  | 0.49      | 3.34 <sup>b</sup>   | 0.52      | 4.49 <sup>c</sup>   | 0.89      |
| 42-49 dpn                             | 4.03 <sup>a</sup>  | 0.76      | 5.14 <sup>b</sup>   | 0.91      | 6.20 <sup>c</sup>   | 0.89      |
| 49-56 dpn                             | 4.87 <sup>a</sup>  | 0.48      | 6.55 <sup>b</sup>   | 1.51      | 6.68 <sup>b</sup>   | 0.87      |
| 56-63 dpn                             | 5.37 <sup>a</sup>  | 0.85      | 7.22 <sup>b</sup>   | 1.02      | 6.17 <sup>a,b</sup> | 1.25      |
| <b>Phosphorus intake (g/day/kgBW)</b> |                    |           |                     |           |                     |           |
| <b>Trial week</b>                     | <b>L</b>           |           | <b>M</b>            |           | <b>H</b>            |           |
|                                       | <b>Mean</b>        | <b>SD</b> | <b>Mean</b>         | <b>SD</b> | <b>Mean</b>         | <b>SD</b> |
| 28-35 dpn                             | 0.12 <sup>a</sup>  | 0.05      | 0.16 <sup>a,b</sup> | 0.06      | 0.19 <sup>b</sup>   | 0.04      |
| 35-42 dpn                             | 0.21 <sup>a</sup>  | 0.02      | 0.29 <sup>b</sup>   | 0.03      | 0.39 <sup>c</sup>   | 0.06      |
| 42-49 dpn                             | 0.27 <sup>a</sup>  | 0.03      | 0.36 <sup>b</sup>   | 0.04      | 0.46 <sup>c</sup>   | 0.02      |
| 49-56 dpn                             | 0.26 <sup>a</sup>  | 0.02      | 0.37 <sup>b</sup>   | 0.06      | 0.46 <sup>c</sup>   | 0.09      |
| 56-63 dpn                             | 0.24 <sup>a</sup>  | 0.02      | 0.36 <sup>b</sup>   | 0.06      | 0.43 <sup>b</sup>   | 0.12      |
| <b>Zinc intake (g/day)</b>            |                    |           |                     |           |                     |           |
| <b>Trial week</b>                     | <b>L</b>           |           | <b>M</b>            |           | <b>H</b>            |           |
|                                       | <b>Mean</b>        | <b>SD</b> | <b>Mean</b>         | <b>SD</b> | <b>Mean</b>         | <b>SD</b> |
| 28-35 dpn                             | 7.44               | 1.88      | 6.51                | 2.32      | 6.98                | 1.58      |
| 35-42 dpn                             | 15.99              | 3.19      | 14.72               | 2.30      | 17.21               | 3.39      |
| 42-49 dpn                             | 26.07              | 4.91      | 22.63               | 4.01      | 23.77               | 3.42      |
| 49-56 dpn                             | 31.50              | 3.08      | 28.85               | 6.66      | 25.62               | 3.33      |
| 56-63 dpn                             | 34.76 <sup>a</sup> | 5.53      | 31.80 <sup>a</sup>  | 4.51      | 23.67 <sup>b</sup>  | 4.80      |
| <b>Zinc intake (g/day/kgBW)</b>       |                    |           |                     |           |                     |           |
| <b>Trial week</b>                     | <b>L</b>           |           | <b>M</b>            |           | <b>H</b>            |           |
|                                       | <b>Mean</b>        | <b>SD</b> | <b>Mean</b>         | <b>SD</b> | <b>Mean</b>         | <b>SD</b> |

|           |                     |      |                   |      |                     |      |
|-----------|---------------------|------|-------------------|------|---------------------|------|
| 28-35 dpn | 0.80                | 0.31 | 0.70              | 0.28 | 0.73                | 0.14 |
| 35-42 dpn | 1.36 <sup>a,b</sup> | 0.16 | 1.27 <sup>a</sup> | 0.15 | 1.48 <sup>b</sup>   | 0.24 |
| 42-49 dpn | 1.77 <sup>a</sup>   | 0.19 | 1.59 <sup>b</sup> | 0.16 | 1.74 <sup>a,b</sup> | 0.09 |
| 49-56 dpn | 1.71                | 0.11 | 1.64              | 0.26 | 1.77                | 0.33 |
| 56-63 dpn | 1.58                | 0.15 | 1.58              | 0.28 | 1.63                | 0.45 |

<sup>a,b,c</sup> Indicate significant differences between groups ( $p < 0.05$ ); L – Low P diet; M – Medium P diet; H – High P diet. dpn=days post natum
