# Supplementary material for: Physiological and Transcriptional Responses in Weaned Piglets Fed Diets with Varying Phosphorus and Calcium Levels
Source: MDPI journal article supplement (doi:10.3390/nu11020436), 2019-02-20
Supplement: s1 [file s1]

**Table S1** Analyzed nutrient composition of the experimental diets.

| <b>Component</b>          | <b>L</b> | <b>M</b> | <b>H</b> |
|---------------------------|----------|----------|----------|
| Dry matter (DM) (g/kg FM) | 898      | 897      | 905      |
| Crude ash (g/kg DM)       | 49.7     | 61.5     | 79.0     |
| Crude protein (g/kg DM)   | 196.0    | 196.2    | 209.9    |
| Crude fiber (g/kg DM)     | 52.0     | 48.9     | 49.7     |
| Crude fat (g/kg DM)       | 35.6     | 33.7     | 31.7     |
| Sugar (g/kg DM)           | 67.6     | 71.0     | 69.8     |
| Starch (g/kg DM)          | 393.1    | 399.1    | 383.4    |
| Energy (MJ/kg DM)         | 14.7     | 14.6     | 14.3     |
| Calcium (g/kg DM)         | 7.9      | 12.7     | 16.9     |
| Phosphorus (g/kg DM)      | 5.7      | 8.4      | 10.2     |
| Phosphorus sol. (g/kg DM) | 3.1      | 4.9      | 6.0      |
| Ca:P Ratio                | 1.6      | 1.7      | 1.8      |
| Zinc (mg/kg DM)           | 36.9     | 37.0     | 39.1     |

FM – Fresh matter; DM – Dry matter; L – Low P diet; M – Medium P diet; H – High P diet
