# Supplementary material for: Physiological and Transcriptional Responses in Weaned Piglets Fed Diets with Varying Phosphorus and Calcium Levels
Source: MDPI journal article supplement (doi:10.3390/nu11020436), 2019-02-20
Supplement: s1 [file s1]

**Table S4** Full list of pathways in PBMC of pigs fed diets with low and high amounts of calcium and phosphorus affected by differentially expressed genes. The threshold was set at  $-\log(\text{B-H p-Value})$  of 1.31 after Benjamini-Hochberg correction.

| Canonical Pathway                                                              | $-\log(\text{B-H p-value})$ | z-score | Molecules                                                                                                            |
|--------------------------------------------------------------------------------|-----------------------------|---------|----------------------------------------------------------------------------------------------------------------------|
| IL-10 Signaling                                                                | 4.1                         |         | ARG2, CCR1, HMOX1, IL1A, IL1RAP, IL1R2, IL4R, IL18, IL18RAP SOCS3                                                    |
| LXR/RXR Activation                                                             | 3.7                         | -2.53   | ARG2, ABCA1, FDFT1, IL1A, IL1RAP, IL1R2, IL18, IL18RAP, LY96, MYLIP, TLR4, TNFRSF1A                                  |
| IL-6 Signaling                                                                 | 3.66                        | 2.89    | CSNK2A1, IL1A, IL1RAP, IL1R2, IL6R, IL18, IL18RAP, JAK2, PIK3C2A, SOCS3, SOS2, TNFRSF1A                              |
| Hepatic Fibrosis / Hepatic Stellate Cell Activation                            | 3.54                        |         | ECE1, IFNGR1, IL1A, IL1RAP, IL1R2, IL4R, IL6R, IL18RAP, LY96, TGFA, TGFB1, TIMP2, TLR4, TNFRSF1A                     |
| Acute Phase Response Signaling                                                 | 3.31                        | 2.11    | C4BPA, F8, HMOX1, IL1A, IL1RAP, IL6R, IL18, JAK2, RIPK1, SOCS3, SOD2, SOS2, TNFRSF1A                                 |
| NF- $\kappa$ B Signaling                                                       | 3.09                        | 3.05    | BMPR2, CSNK2A1, IL1A, IL1R2, IL18, IRAK4, PIK3C2A, RIPK1, TGFA, TGFB1, TLR4, TNFRSF1A, TNFSF13B                      |
| LPS/IL-1 Mediated Inhibition of RXR Function                                   | 2.82                        | 1.89    | ABCA1, ACSL1, ACSL4, ALDH1L2, GSTM3, IL1A, IL1RAP, IL1R2, IL18, IL18RAP, LY96, RARA, TLR4, TNFRSF1A                  |
| CDP-diacylglycerol Biosynthesis I                                              | 2.67                        |         | CDS1, GPAT3, GPAT4, LPCAT2, MBOAT7                                                                                   |
| Phosphatidylglycerol Biosynthesis II (Non-plastidic)                           | 2.55                        |         | CDS1, GPAT3, GPAT4, LPCAT2, MBOAT7                                                                                   |
| Th1 and Th2 Activation Pathway                                                 | 2.55                        |         | BMPR2, CCR1, CD247, CD274, IFNGR1, IL4R, IL6R, IL18, JAK2, NOTCH2, PIK3C2A, SOCS3, TGFB1                             |
| Role of Macrophages, Fibroblasts and Endothelial Cells in Rheumatoid Arthritis | 2.55                        |         | IL1A, IL1RAP, IL1R2, IL6R, IL17RA, IL18, IL18RAP, IRAK4, JAK2, LRP1, PIK3C2A, RIPK1, SOCS3, TLR4, TNFRSF1A, TNFSF13B |
| Triacylglycerol Biosynthesis                                                   | 2.42                        |         | DGAT2, GPAT3, GPAT4, LPCAT2, PLPP3, MBOAT7                                                                           |
| p38 MAPK Signaling                                                             | 2.3                         | 2.82    | IL1A, IL1RAP, IL1R2, IL18, IL18RAP, IRAK4, RPS6KA3, TGFB1, TNFRSF1A                                                  |
| Fcy Receptor-mediated Phagocytosis in Macrophages and Monocytes                | 2.3                         | 2.12    | ARPC2, FGR, GAB2, HCK, HMOX1, NCF1, PTEN, PTK2B                                                                      |
| Granulocyte Adhesion and Diapedesis                                            | 2.25                        |         | CCL14, CSF3R, CXCR2, IL1A, IL1RAP, IL1R2, IL18, IL18RAP, ITGAM, SELL, TNFRSF1A                                       |
| T Helper Cell Differentiation                                                  | 2.25                        |         | BCL6, IFNGR1, IL4R, IL6R, IL18, TGFB1, TNFRSF1A                                                                      |
| Hepatic Cholestasis                                                            | 2.08                        |         | IL1A, IL1RAP, IL1R2, IL18, LY96, RARA, TLR4, TNFRSF1A, IL18RAP, IRAK4                                                |
| EIF2 Signaling                                                                 | 2.08                        | -1.13   | ATF3, EIF3K, PIK3C2A, RPL7, RPL12, RPL24, RPL34, RPSA, RPS8, RPS19, RPS26, SOS2                                      |
| D-myo-inositol                                                                 | 1.86                        |         | ACP1, DUSP2, IPMK, PPP1R12A, PTEN, PTPN12,                                                                           |

|                                                                                       |      |       |                                                                                                                                                                             |
|---------------------------------------------------------------------------------------|------|-------|-----------------------------------------------------------------------------------------------------------------------------------------------------------------------------|
| (1,4,5,6)-<br>Tetrakisphosphate<br>Biosynthesis                                       |      |       | SET, <b>SOCS3</b> , <b>TNS3</b>                                                                                                                                             |
| D-myo-inositol<br>(3,4,5,6)-<br>tetrakisphosphate<br>Biosynthesis                     | 1.86 |       | ACP1, <b>DUSP2</b> , <b>IPMK</b> , <b>PPP1R12A</b> , <b>PTEN</b> , <b>PTPN12</b> ,<br>SET, <b>SOCS3</b> , <b>TNS3</b> ,                                                     |
| iNOS Signaling                                                                        | 1.82 | 2.24  | <b>IFNGR1</b> , <b>IRAK4</b> , <b>JAK2</b> , <b>LY96</b> , <b>TLR4</b>                                                                                                      |
| PPAR Signaling                                                                        | 1.77 | -2.65 | <b>IL1A</b> , <b>IL1RAP</b> , <b>IL1R2</b> , <b>IL18</b> , <b>IL18RAP</b> , <b>SOS2</b> ,<br><b>TNFRSF1A</b> ,                                                              |
| RhoA Signaling                                                                        | 1.76 | 0.38  | <b>ABL2</b> , <b>ARHGAP6</b> , <b>ARPC2</b> , <b>LIMK2</b> , <b>LPAR6</b> ,<br><b>PIP5K1B</b> , <b>PPP1R12A</b> , <b>PTK2B</b>                                              |
| Role of Osteoblasts,<br>Osteoclasts and<br>Chondrocytes in<br>Rheumatoid Arthritis    | 1.53 |       | <b>ADAM17</b> , <b>BMPR2</b> , <b>IL1A</b> , <b>IL1RAP</b> , <b>IL1R2</b> , <b>IL18</b> ,<br><b>IL18RAP</b> , <b>LRP1</b> , <b>PIK3C2A</b> , <b>PTK2B</b> , <b>TNFRSF1A</b> |
| Th1 Pathway                                                                           | 1.53 | 1.13  | <b>CD247</b> , <b>CD274</b> , <b>IFNGR1</b> , <b>IL6R</b> , <b>IL18</b> , <b>JAK2</b> ,<br><b>NOTCH2</b> , <b>PIK3C2A</b> , <b>SOCS3</b>                                    |
| 3-phosphoinositide<br>Biosynthesis                                                    | 1.53 |       | ACP1, <b>DUSP2</b> , <b>PIK3C2A</b> , <b>PIP5K1B</b> , <b>PPP1R12A</b> ,<br><b>PTEN</b> , <b>PTPN12</b> , SET, <b>SOCS3</b> , <b>TNS3</b>                                   |
| Superpathway of<br>Inositol Phosphate<br>Compounds                                    | 1.53 |       | ACP1, <b>DUSP2</b> , <b>IPMK</b> , <b>PIK3C2A</b> , <b>PIP5K1B</b> ,<br><b>PPP1R12A</b> , <b>PTEN</b> , <b>PTPN12</b> , SET, <b>SOCS3</b> , <b>TNS3</b>                     |
| Role of Pattern<br>Recognition Receptors<br>in Recognition of<br>Bacteria and Viruses | 1.52 | 2.00  | <b>C3AR1</b> , <b>DDX58</b> , <b>IL1A</b> , <b>IL18</b> , <b>NOD1</b> , <b>OAS1</b> , <b>PIK3C2A</b> ,<br><b>TLR4</b>                                                       |
| Type I Diabetes Mellitus<br>Signaling                                                 | 1.47 | 1.89  | <b>CD247</b> , <b>IFNGR1</b> , <b>IL1RAP</b> , <b>JAK2</b> , <b>RIPK1</b> , <b>SOCS3</b> ,<br><b>TNFRSF1A</b>                                                               |
| Interferon Signaling                                                                  | 1.44 | 2.00  | <b>IFIT3</b> , <b>IFNGR1</b> , <b>JAK2</b> , <b>OAS1</b>                                                                                                                    |
| MSP-RON Signaling<br>Pathway                                                          | 1.44 |       | <b>CSF2RB</b> , <b>ITGAM</b> , <b>JAK2</b> , <b>PIK3C2A</b> , <b>TLR4</b>                                                                                                   |
| Th2 Pathway                                                                           | 1.35 | 0.70  | <b>BMPR2</b> , <b>CCR1</b> , <b>CD247</b> , <b>IL4R</b> , <b>JAK2</b> , <b>NOTCH2</b> ,<br><b>PIK3C2A</b> , <b>SOCS3</b> , <b>TGFBR1</b>                                    |
| PDGF Signaling                                                                        | 1.34 | 0.82  | <b>ABL2</b> , ACP1, <b>CSNK2A1</b> , <b>JAK2</b> , <b>PIK3C2A</b> , <b>SOS2</b>                                                                                             |

The significance of association between the data set and pathway: \*p < 0.05; †p < 0.01; ‡p < 0.001. Positive and negative z-scores suggest activation or inhibition, respectively. Missing z-scores have not been calculated due to lack of database information. Gene symbols in bold font: H > L; gene symbols in normal font: H < L.
