# Supplementary material for: Physiological and Transcriptional Responses in Weaned Piglets Fed Diets with Varying Phosphorus and Calcium Levels
Source: MDPI journal article supplement (doi:10.3390/nu11020436), 2019-02-20
Supplement: s1 [file s1]

**Table S2** Performance and feed intake of pigs fed variable dietary amounts of calcium and phosphorus. Data refer to the weekly documentation of body weight, body weight gain and feed intake throughout the feeding trial.

| <b>Body weight (kg)</b>               |                      |           |                       |           |                     |           |                |
|---------------------------------------|----------------------|-----------|-----------------------|-----------|---------------------|-----------|----------------|
| <b>Age</b>                            | <b>L</b>             |           | <b>M</b>              |           | <b>H</b>            |           | <b>p-Value</b> |
|                                       | <b>Mean</b>          | <b>SD</b> | <b>Mean</b>           | <b>SD</b> | <b>Mean</b>         | <b>SD</b> |                |
| 28 dpn                                | 8.49                 | 1.67      | 8.42                  | 1.50      | 8.42                | 0.81      | 0.991          |
| 35 dpn                                | 9.61                 | 1.57      | 9.43                  | 1.36      | 9.57                | 0.94      | 0.949          |
| 42 dpn                                | 11.74                | 1.90      | 11.65                 | 1.78      | 11.63               | 1.08      | 0.983          |
| 49 dpn                                | 14.71                | 2.29      | 14.30                 | 2.32      | 13.60               | 1.48      | 0.441          |
| 56 dpn                                | 18.49 <sup>a</sup>   | 2.28      | 17.59 <sup>a</sup>    | 3.36      | 14.65 <sup>b</sup>  | 2.04      | 0.020          |
| 63 dpn                                | 22.00 <sup>a</sup>   | 2.51      | 20.58 <sup>a</sup>    | 4.26      | 14.95 <sup>b</sup>  | 3.01      | 0.002          |
| <b>Daily body weight gain (g/day)</b> |                      |           |                       |           |                     |           |                |
| <b>Trial week</b>                     | <b>L</b>             |           | <b>M</b>              |           | <b>H</b>            |           | <b>p-Value</b> |
|                                       | <b>Mean</b>          | <b>SD</b> | <b>Mean</b>           | <b>SD</b> | <b>Mean</b>         | <b>SD</b> |                |
| 28-35 dpn                             | 160.29               | 42.05     | 144.43                | 73.02     | 164.29              | 52.93     | 0.7788         |
| 35-42 dpn                             | 304.00               | 61.34     | 316.71                | 64.70     | 294.29              | 51.54     | 0.8042         |
| 42-49 dpn                             | 448.00 <sup>a</sup>  | 95.45     | 378.29 <sup>a</sup>   | 107.61    | 280.43 <sup>b</sup> | 95.95     | 0.0081         |
| 49-56 dpn                             | 515.29 <sup>a</sup>  | 36.11     | 470.00 <sup>a</sup>   | 200.54    | 151.00 <sup>b</sup> | 129.61    | 0.0005         |
| 56-63 dpn                             | 585.57 <sup>a</sup>  | 90.65     | 499.14 <sup>a</sup>   | 276.19    | 49.43 <sup>b</sup>  | 179.78    | 0.0003         |
| <b>Daily feed intake (g/day)</b>      |                      |           |                       |           |                     |           |                |
| <b>Trial week</b>                     | <b>L</b>             |           | <b>M</b>              |           | <b>H</b>            |           | <b>p-Value</b> |
|                                       | <b>Mean</b>          | <b>SD</b> | <b>Mean</b>           | <b>SD</b> | <b>Mean</b>         | <b>SD</b> |                |
| 28-35 dpn                             | 224.43               | 56.73     | 196.29                | 69.92     | 197.14              | 44.69     | 0.568          |
| 35-42 dpn                             | 482.43               | 96.35     | 443.43                | 69.30     | 486.29              | 95.90     | 0.490          |
| 42-49 dpn                             | 786.86 <sup>a</sup>  | 148.31    | 682.00 <sup>a,b</sup> | 120.68    | 671.71 <sup>b</sup> | 96.56     | 0.078          |
| 49-56 dpn                             | 950.71 <sup>a</sup>  | 92.89     | 869.14 <sup>a</sup>   | 200.63    | 724.14 <sup>b</sup> | 94.13     | 0.007          |
| 56-63 dpn                             | 1048.86 <sup>a</sup> | 166.85    | 958.14 <sup>a</sup>   | 136.02    | 668.86 <sup>b</sup> | 135.57    | 0.001          |

<sup>a,b</sup> Indicate significant differences between groups ( $p < 0.05$ ); L – Low P diet; M – Medium P diet; H – High P diet. dpn=days post natum
